# Supplementary material for: Water-soluble 4-(dimethylaminomethyl)heliomycin exerts greater antitumor effects than parental heliomycin by targeting the tNOX-SIRT1 axis and apoptosis in oral cancer cells
Source: eLife journal article supplement (doi:10.7554/elife.87873), 2023-08-25
Supplement: fig4-data2 [file elife-87873-fig4-data2-v1.zip]

Figure 4

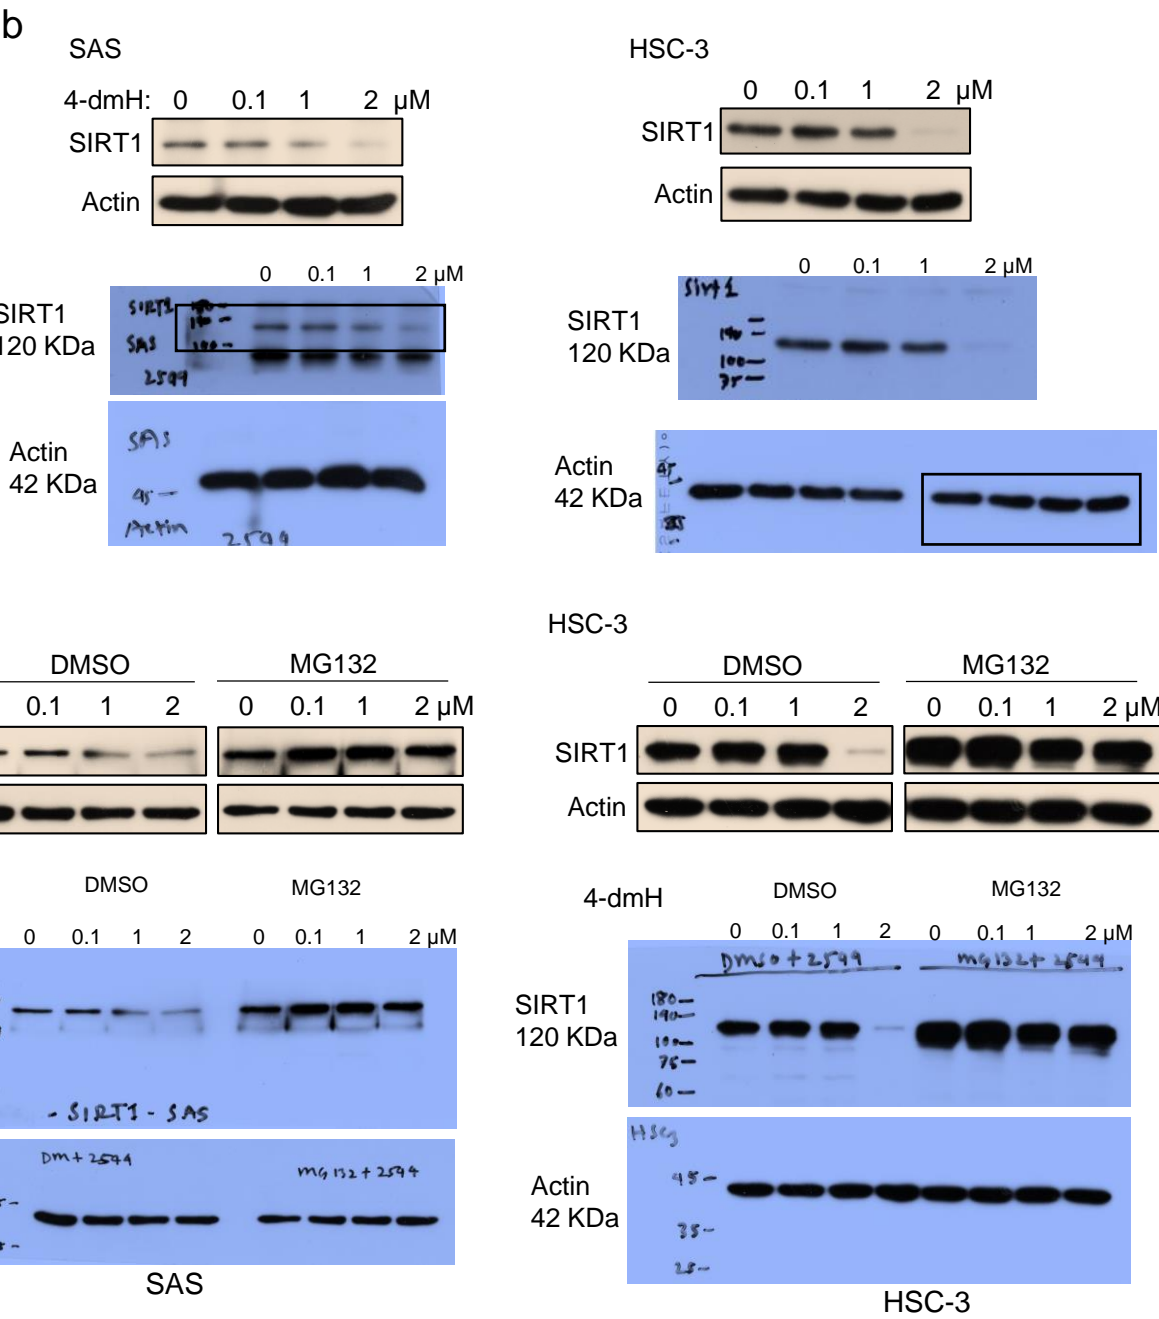

Figure 4

d

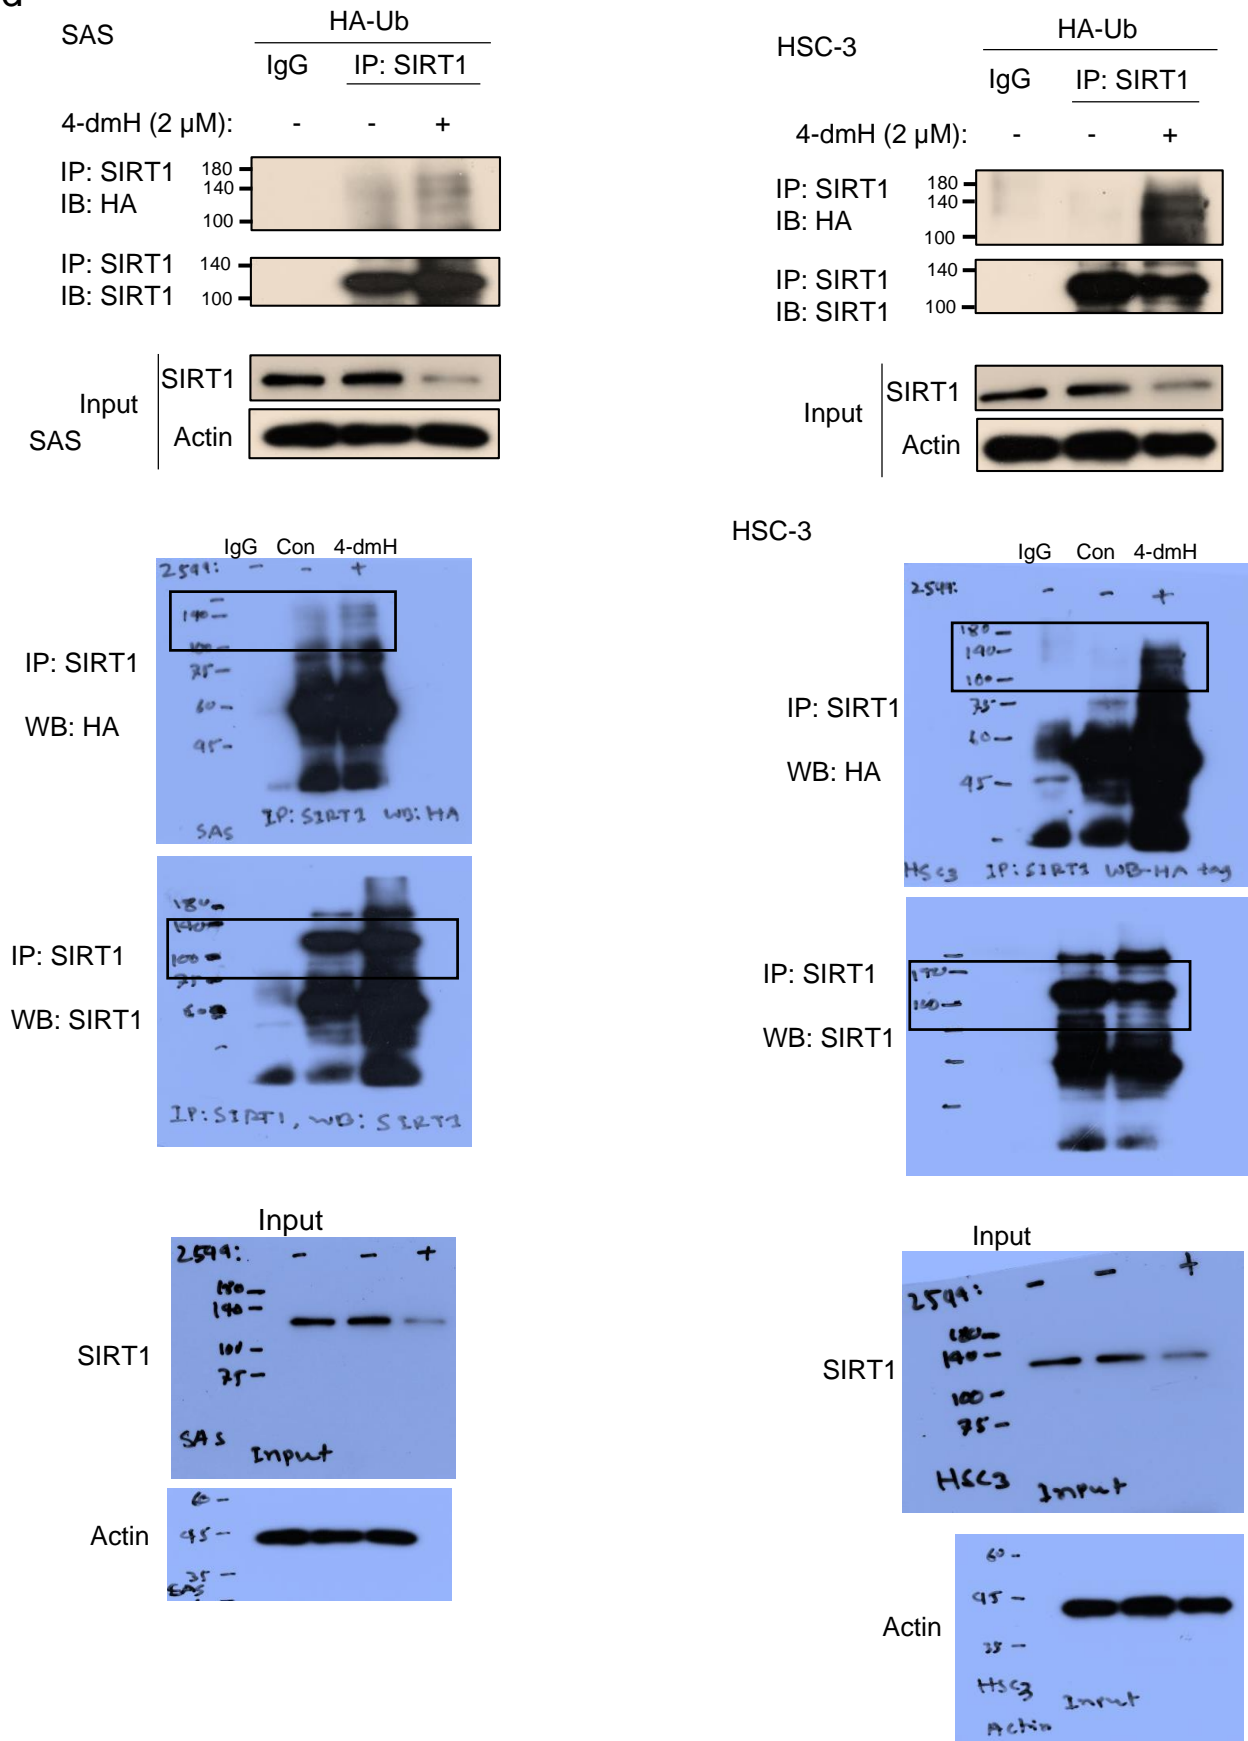

HSC-3

HA-Ub

IgG

IP: SIRT1

4-dmH (2  $\mu$ M):

-

-

+

IP: SIRT1

IB: HA

180

140

100

IP: SIRT1

IB: SIRT1

140

100

Input

SIRT1

Actin

IP: SIRT1

WB: HA

254k

180

140

100

75

60

45

IP: SIRT1

WB: SIRT1

180

140

100

75

60

45

Input

SIRT1

254k

180

140

100

75

Input

Actin

60

45

35

25
