# Supplementary figures and images for: Water-soluble 4-(dimethylaminomethyl)heliomycin exerts greater antitumor effects than parental heliomycin by targeting the tNOX-SIRT1 axis and apoptosis in oral cancer cells
Source: eLife journal article supplement (doi:10.7554/elife.87873), 2023-08-25

Figure 10

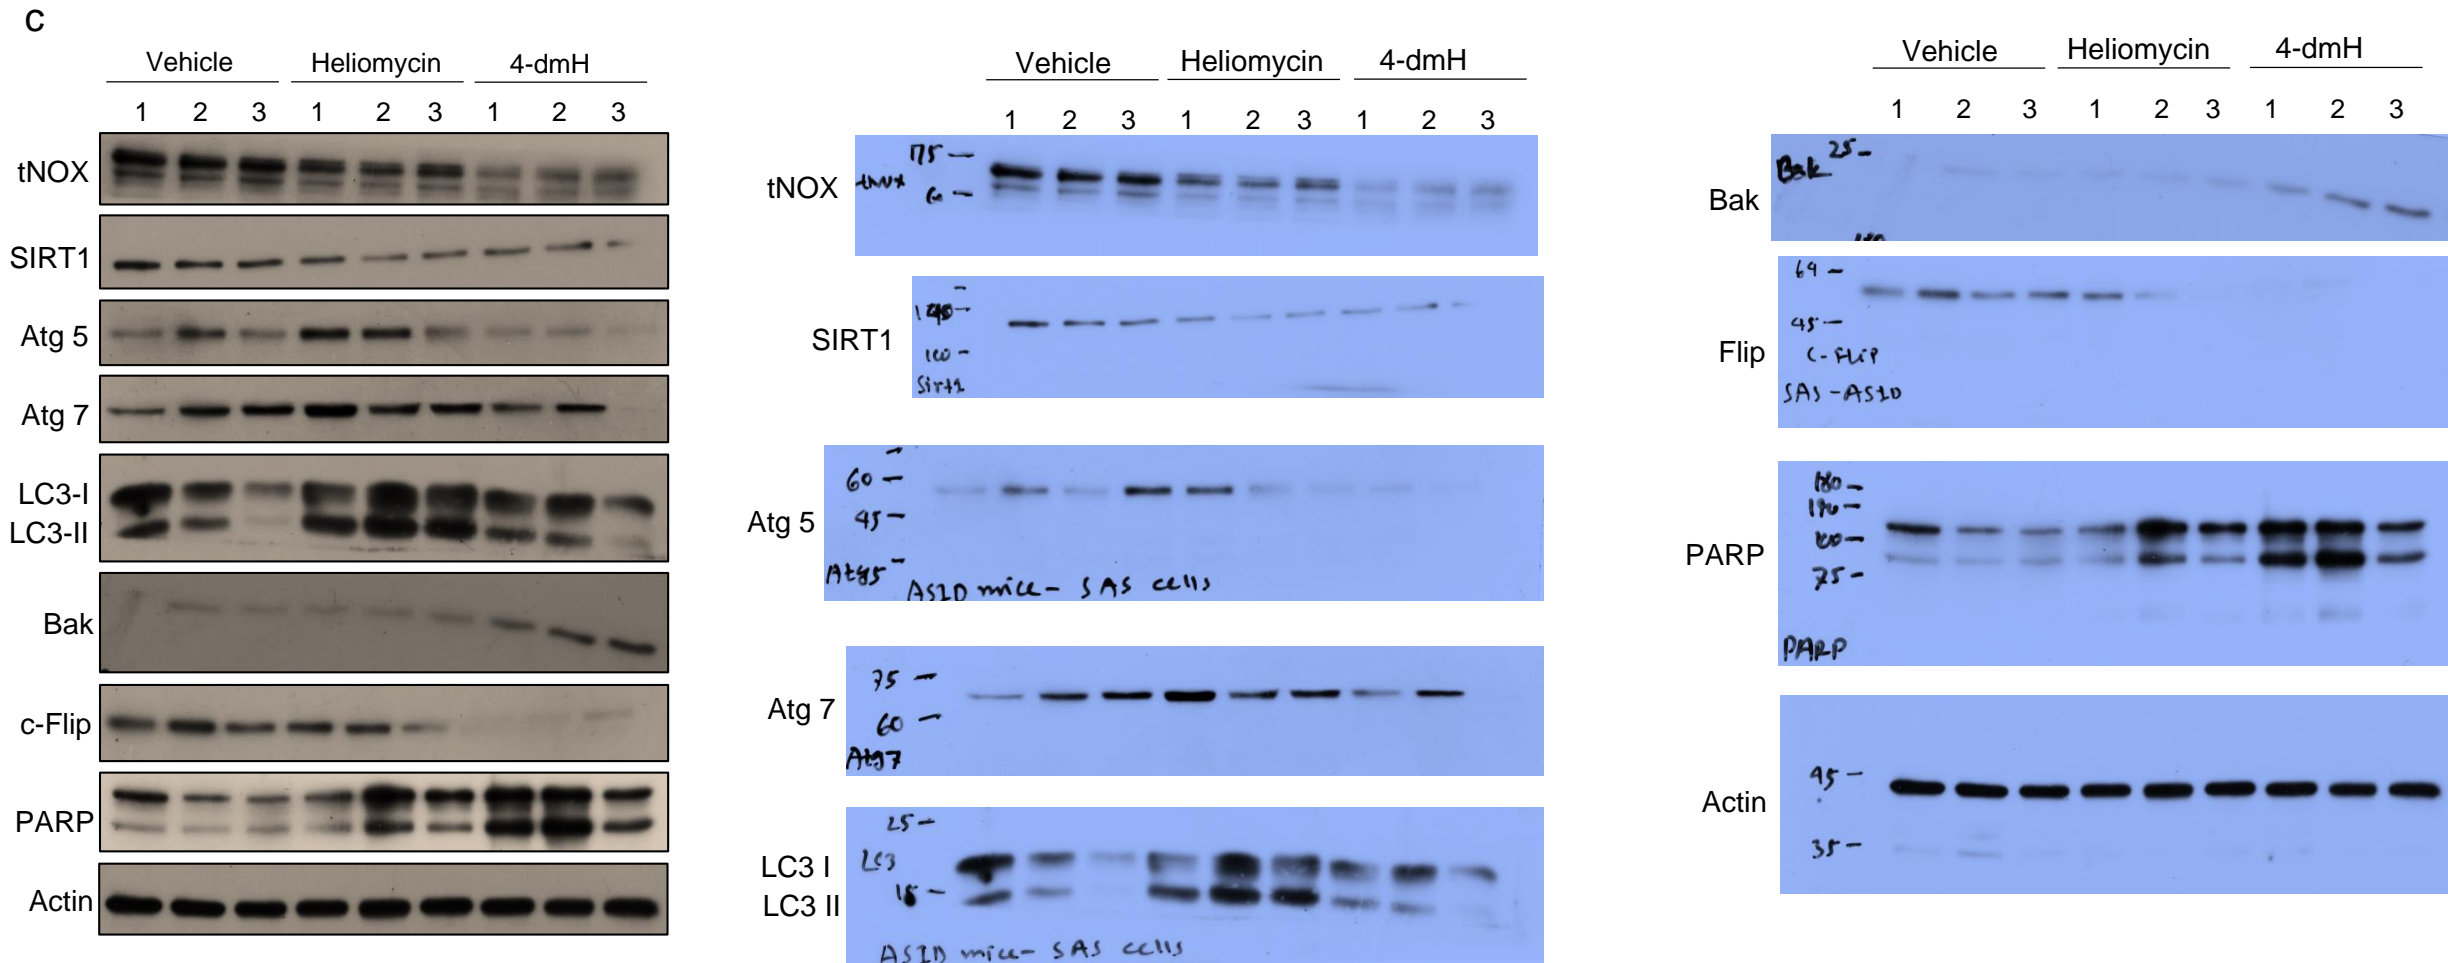

Figure 10

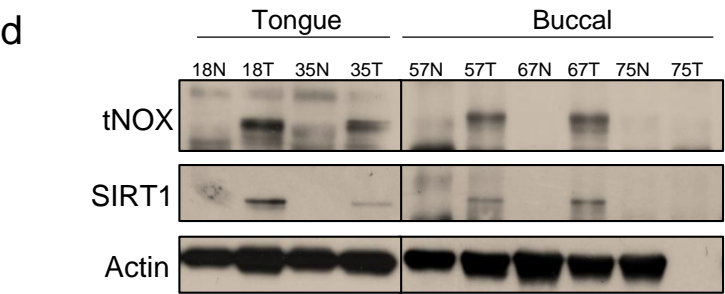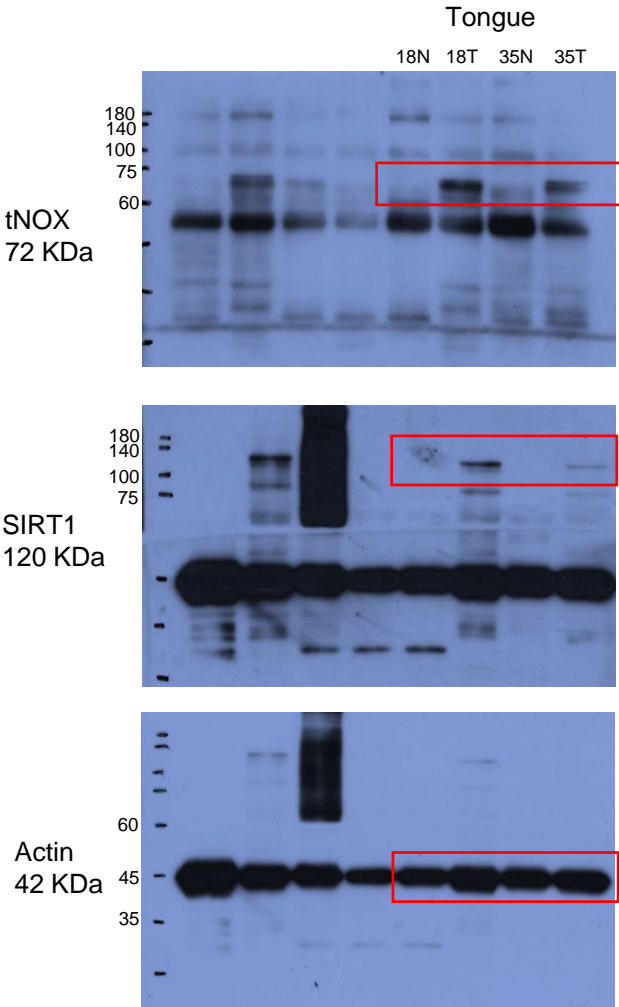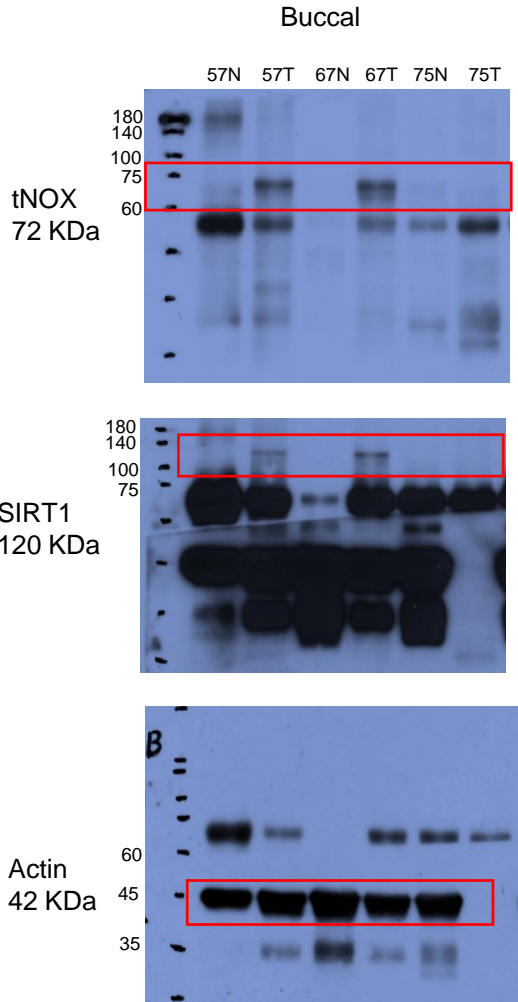

Supplement: fig10-data2 [file elife-87873-fig10-data2-v1.zip]

Figure 5

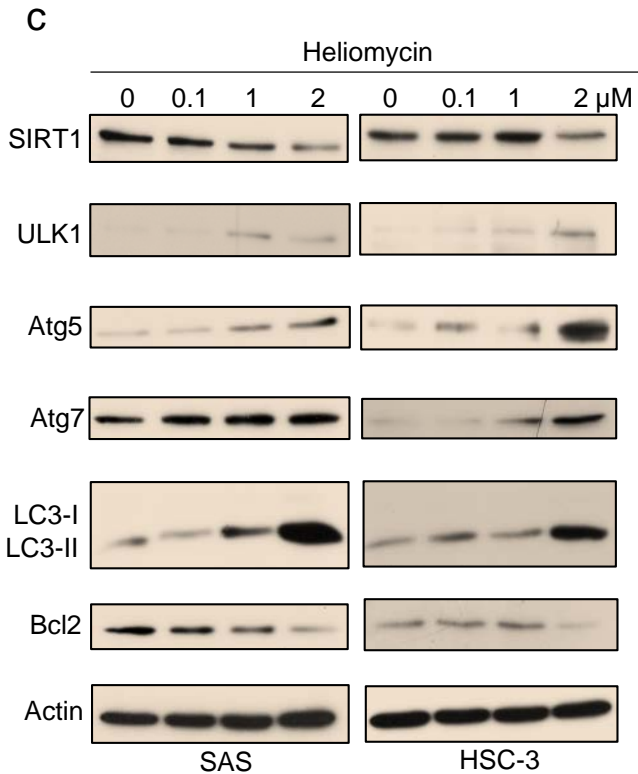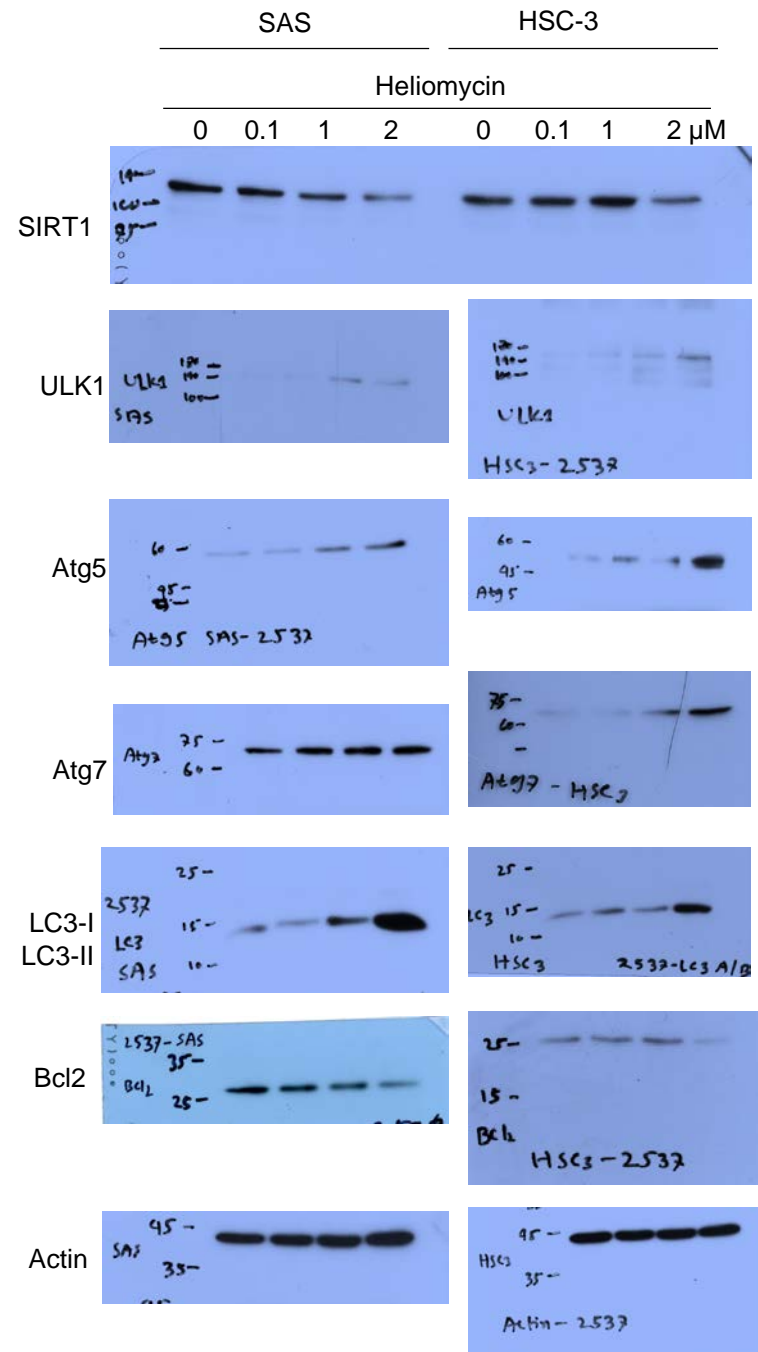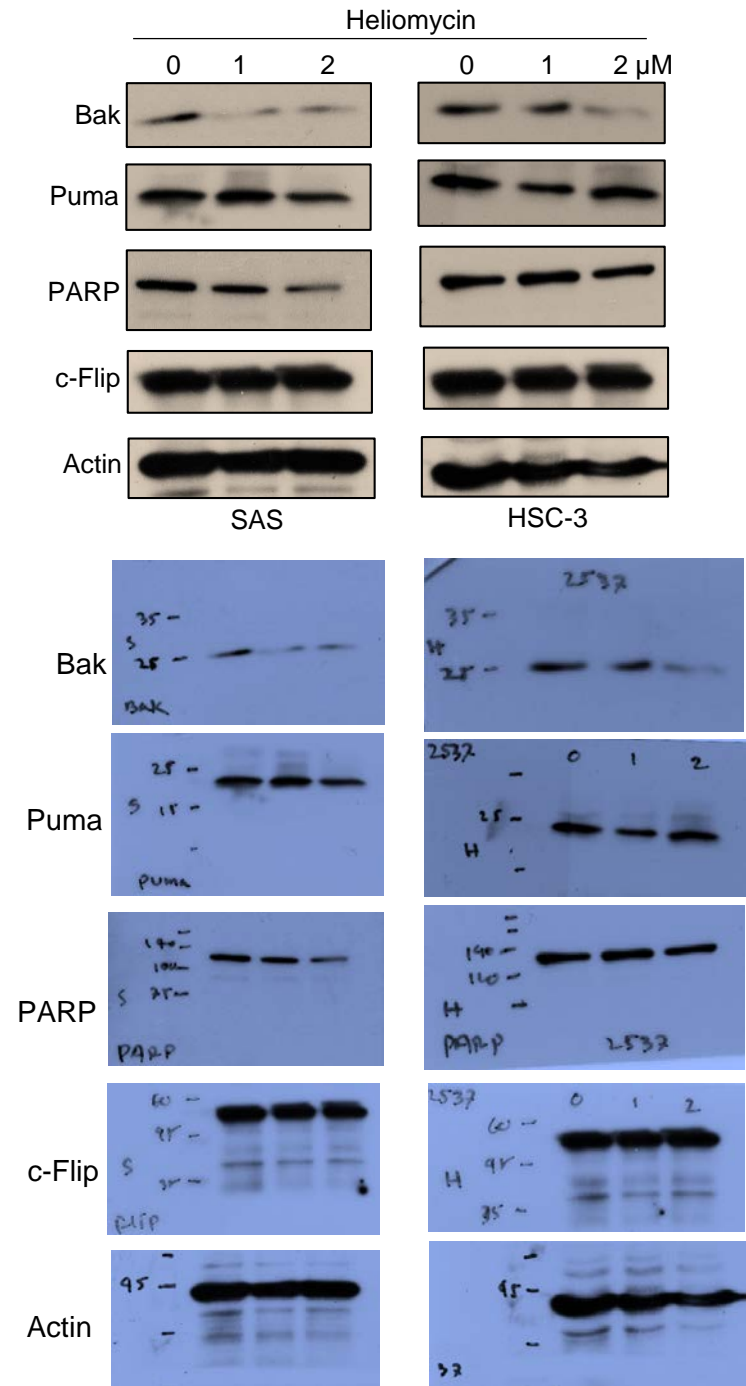

Figure 5

d

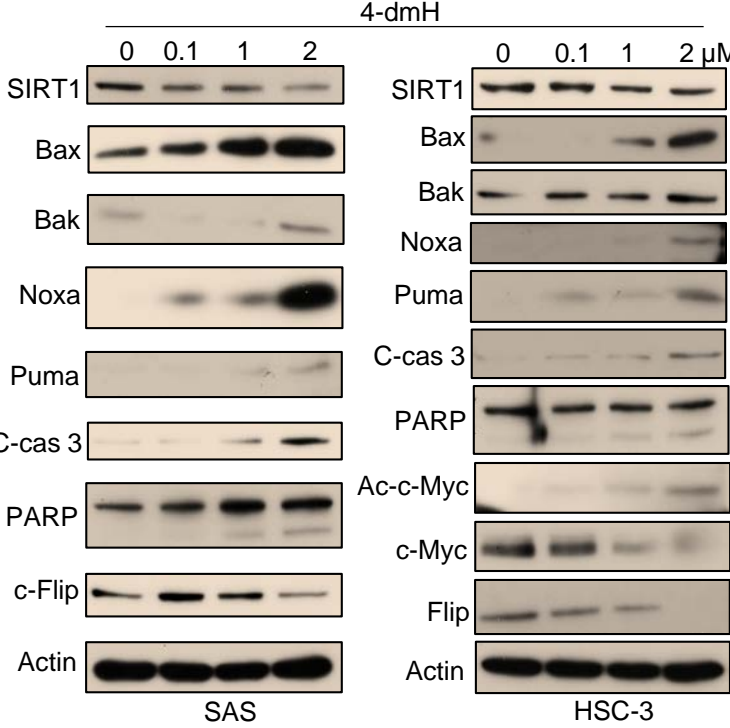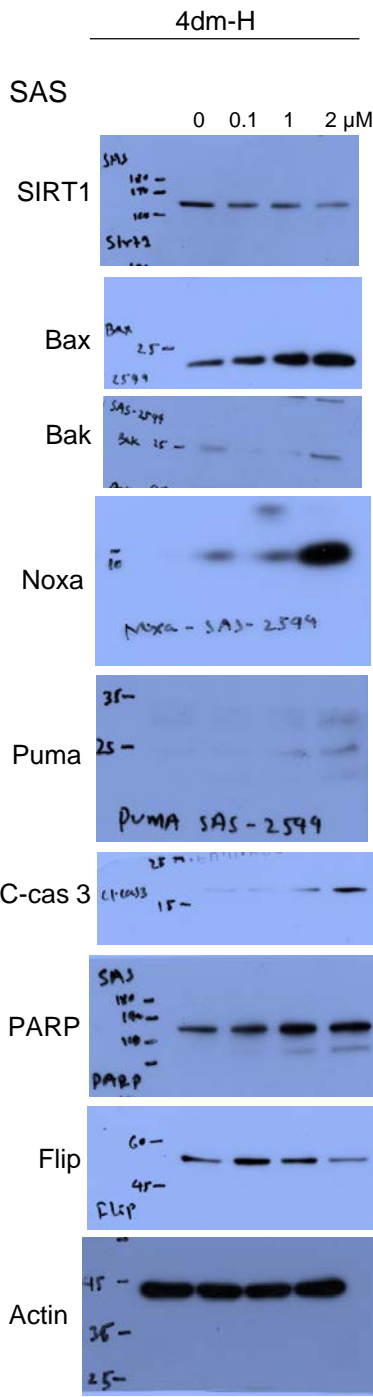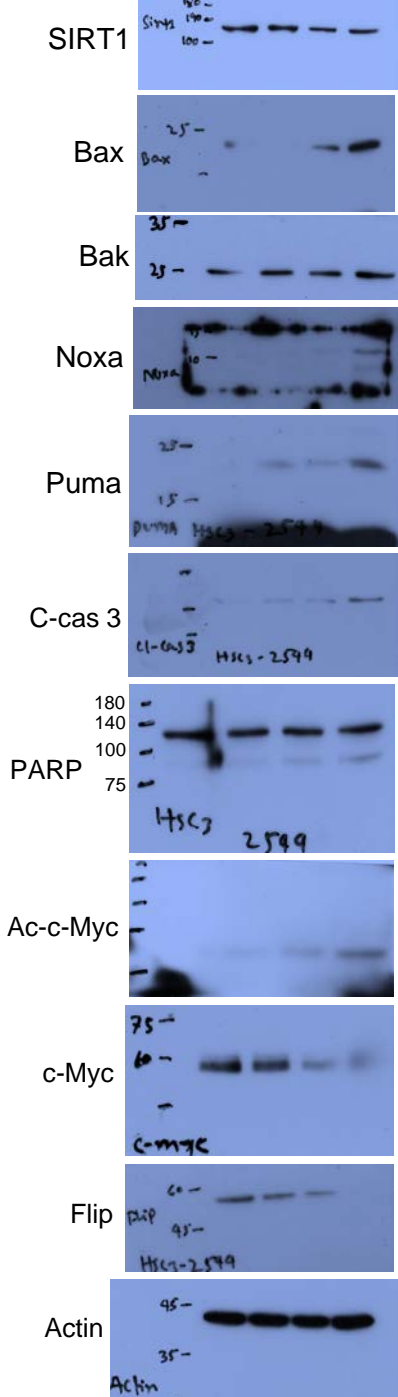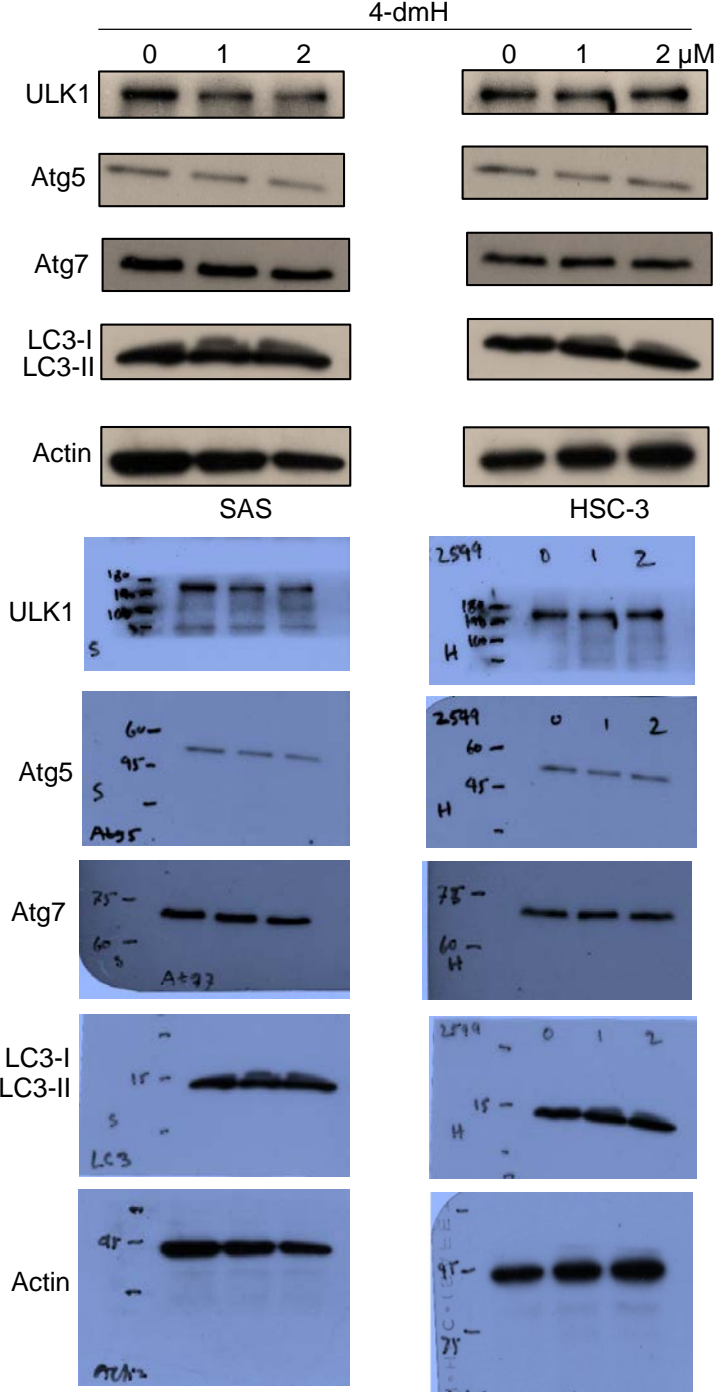

Supplement: fig5-data4 [file elife-87873-fig5-data4-v1.zip]

Figure 7

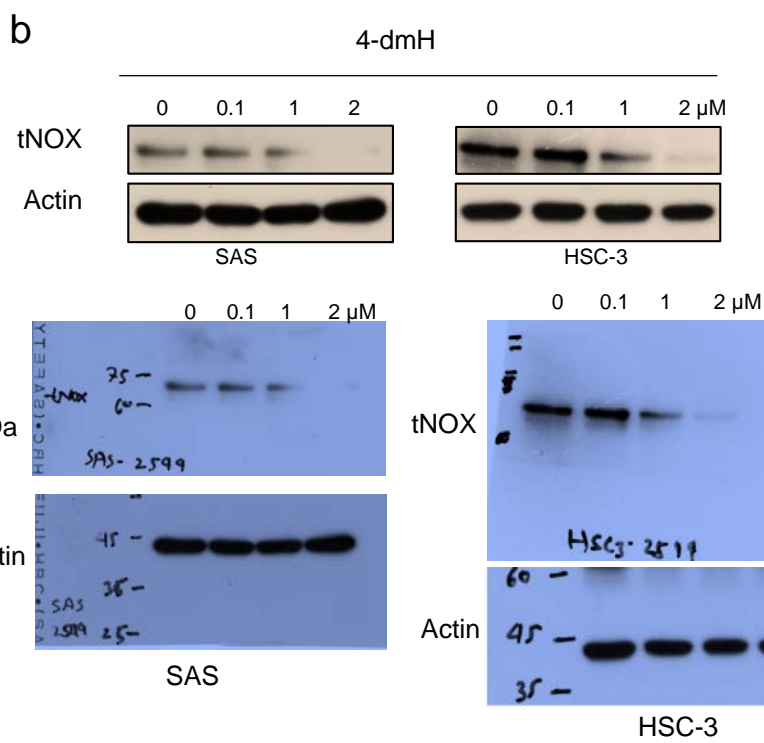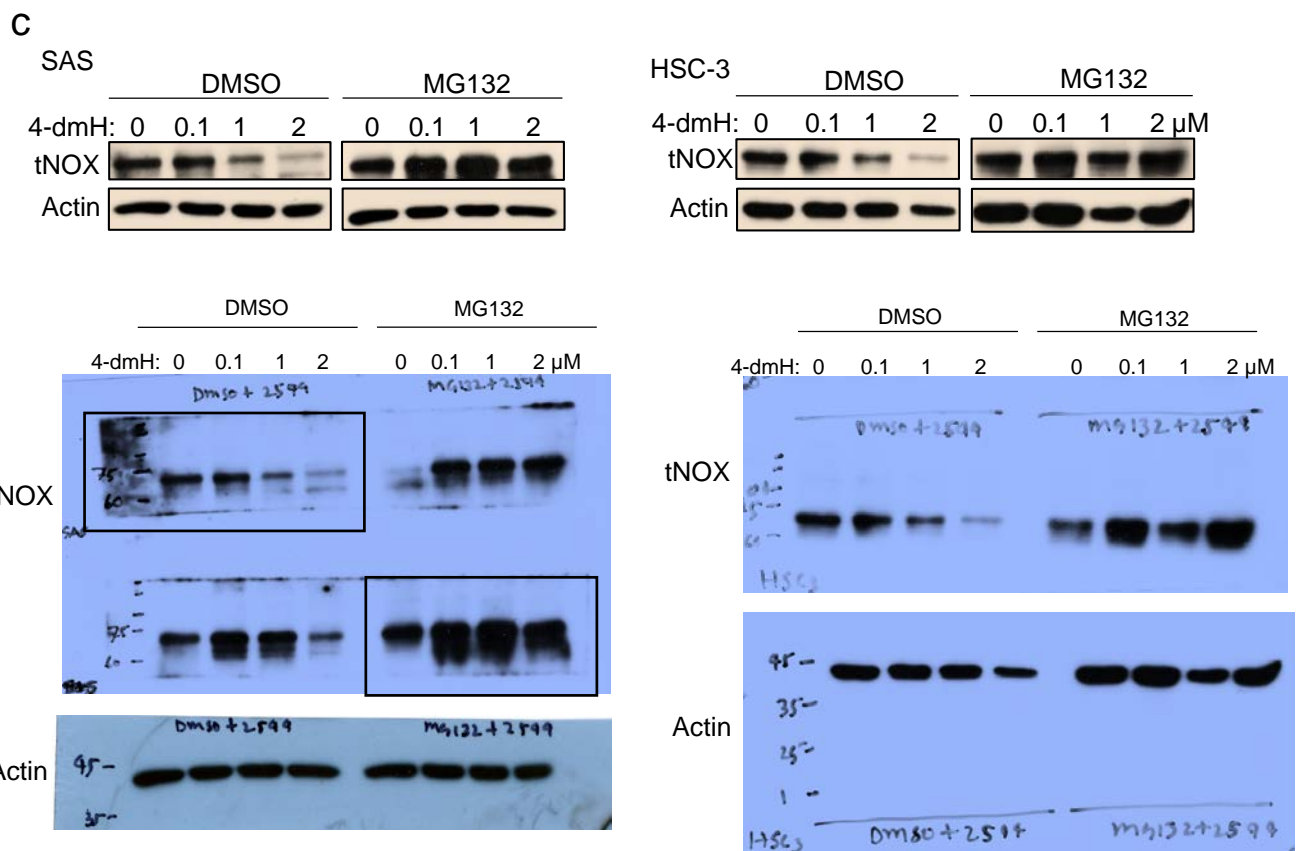

Figure 7

d

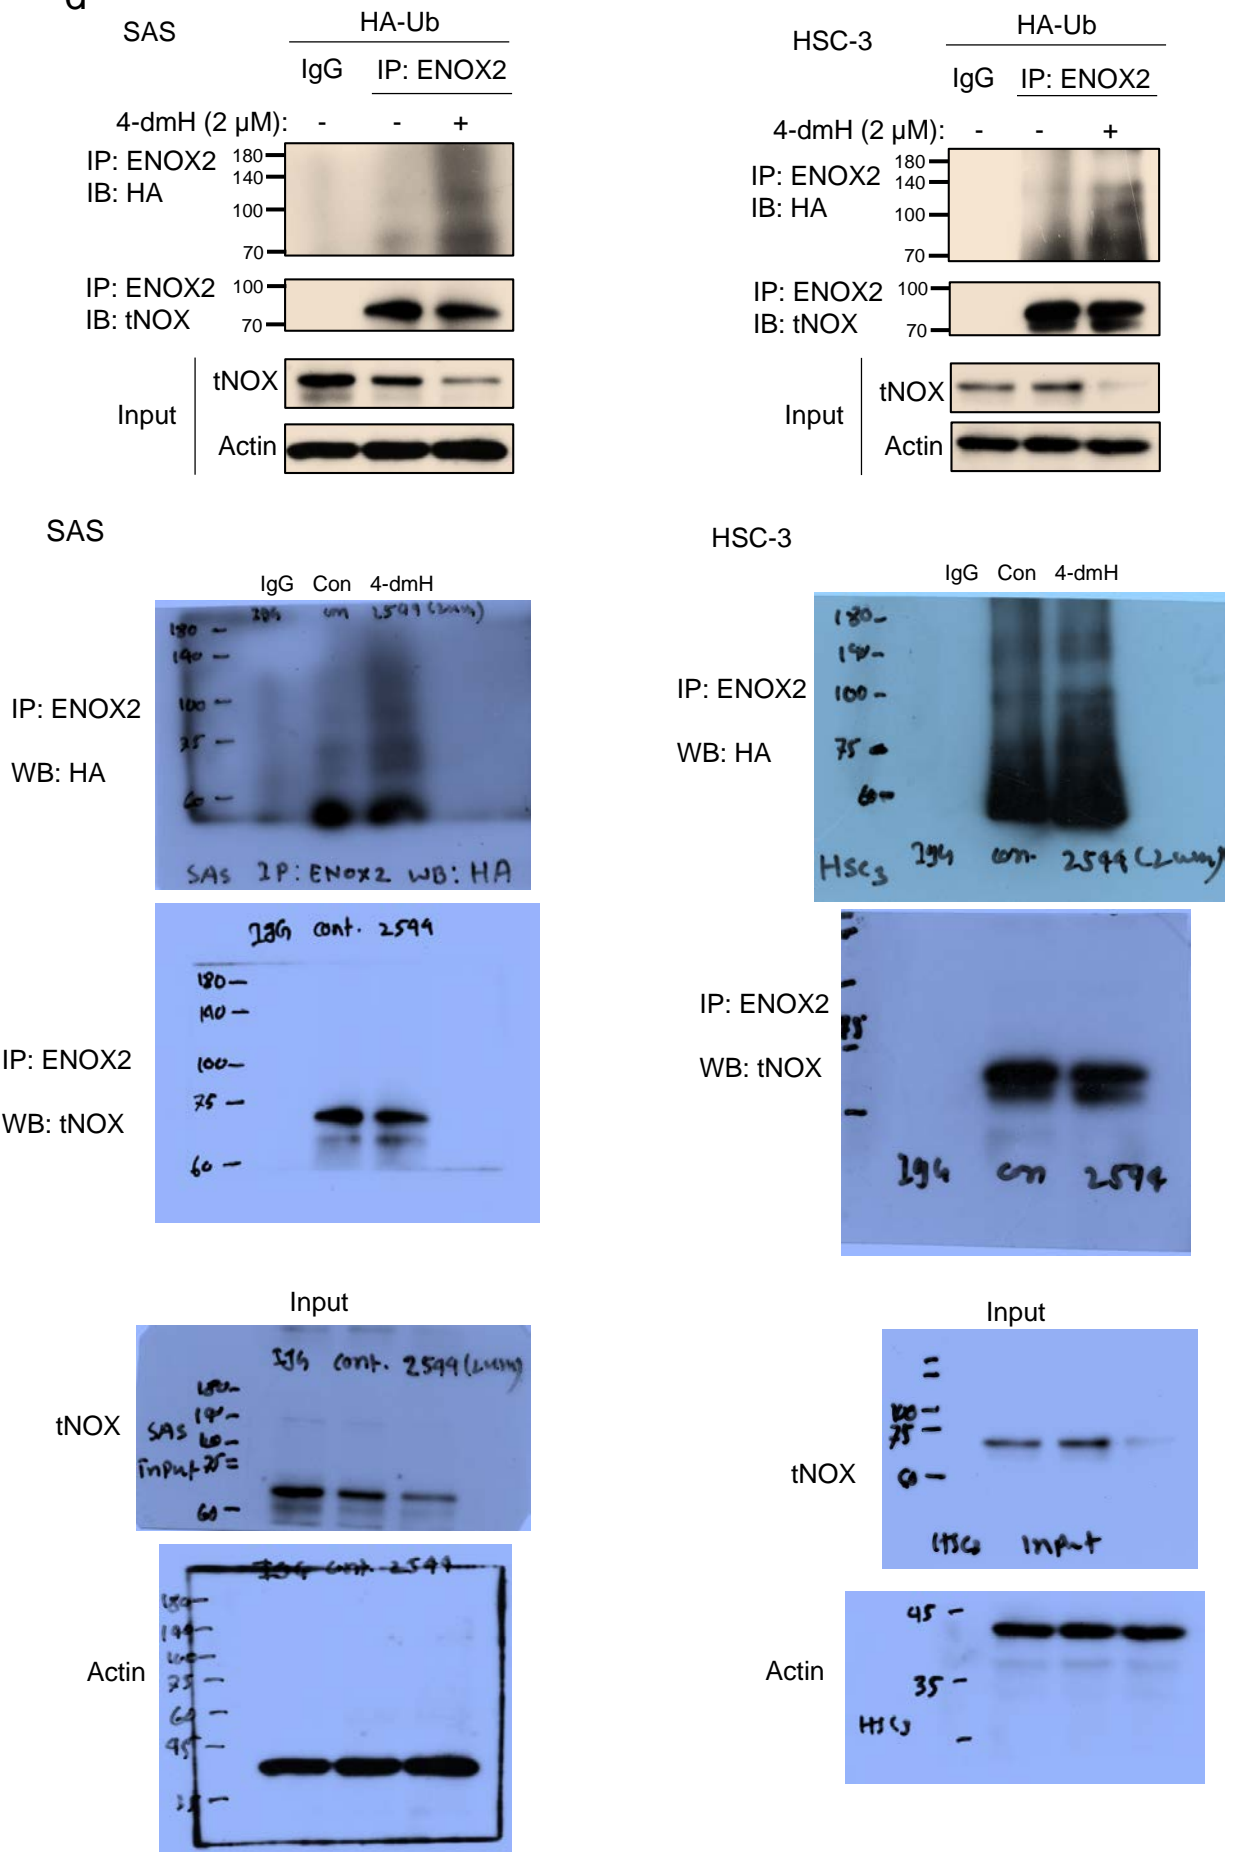

e

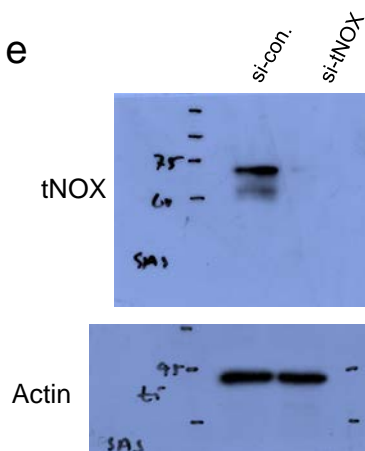

Supplement: fig7-data2 [file elife-87873-fig7-data2-v1.zip]

Figure 8

a

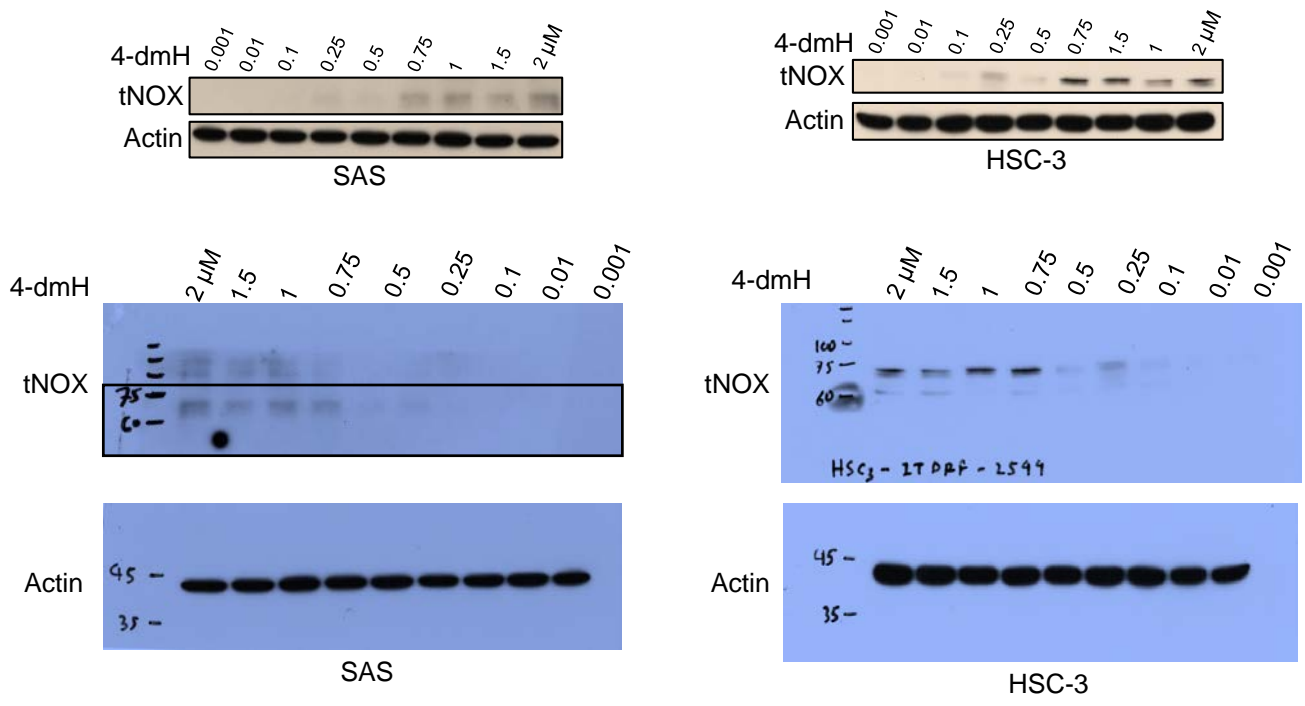

b

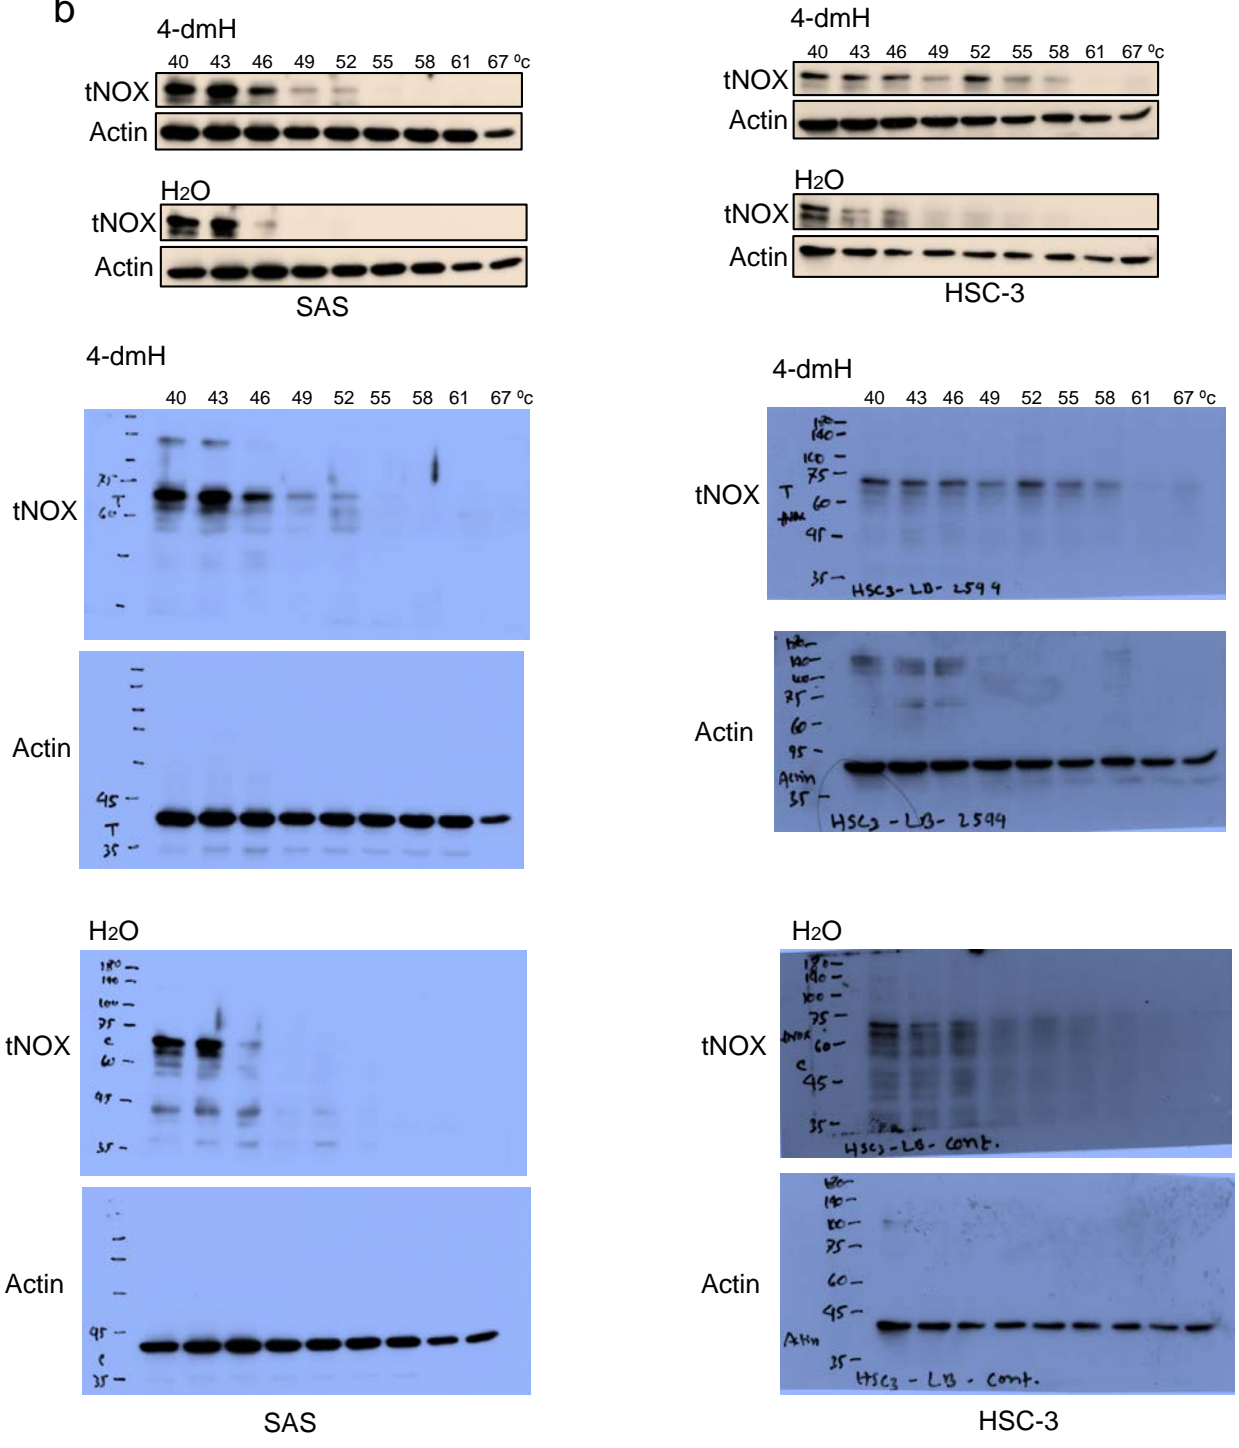

Figure 8

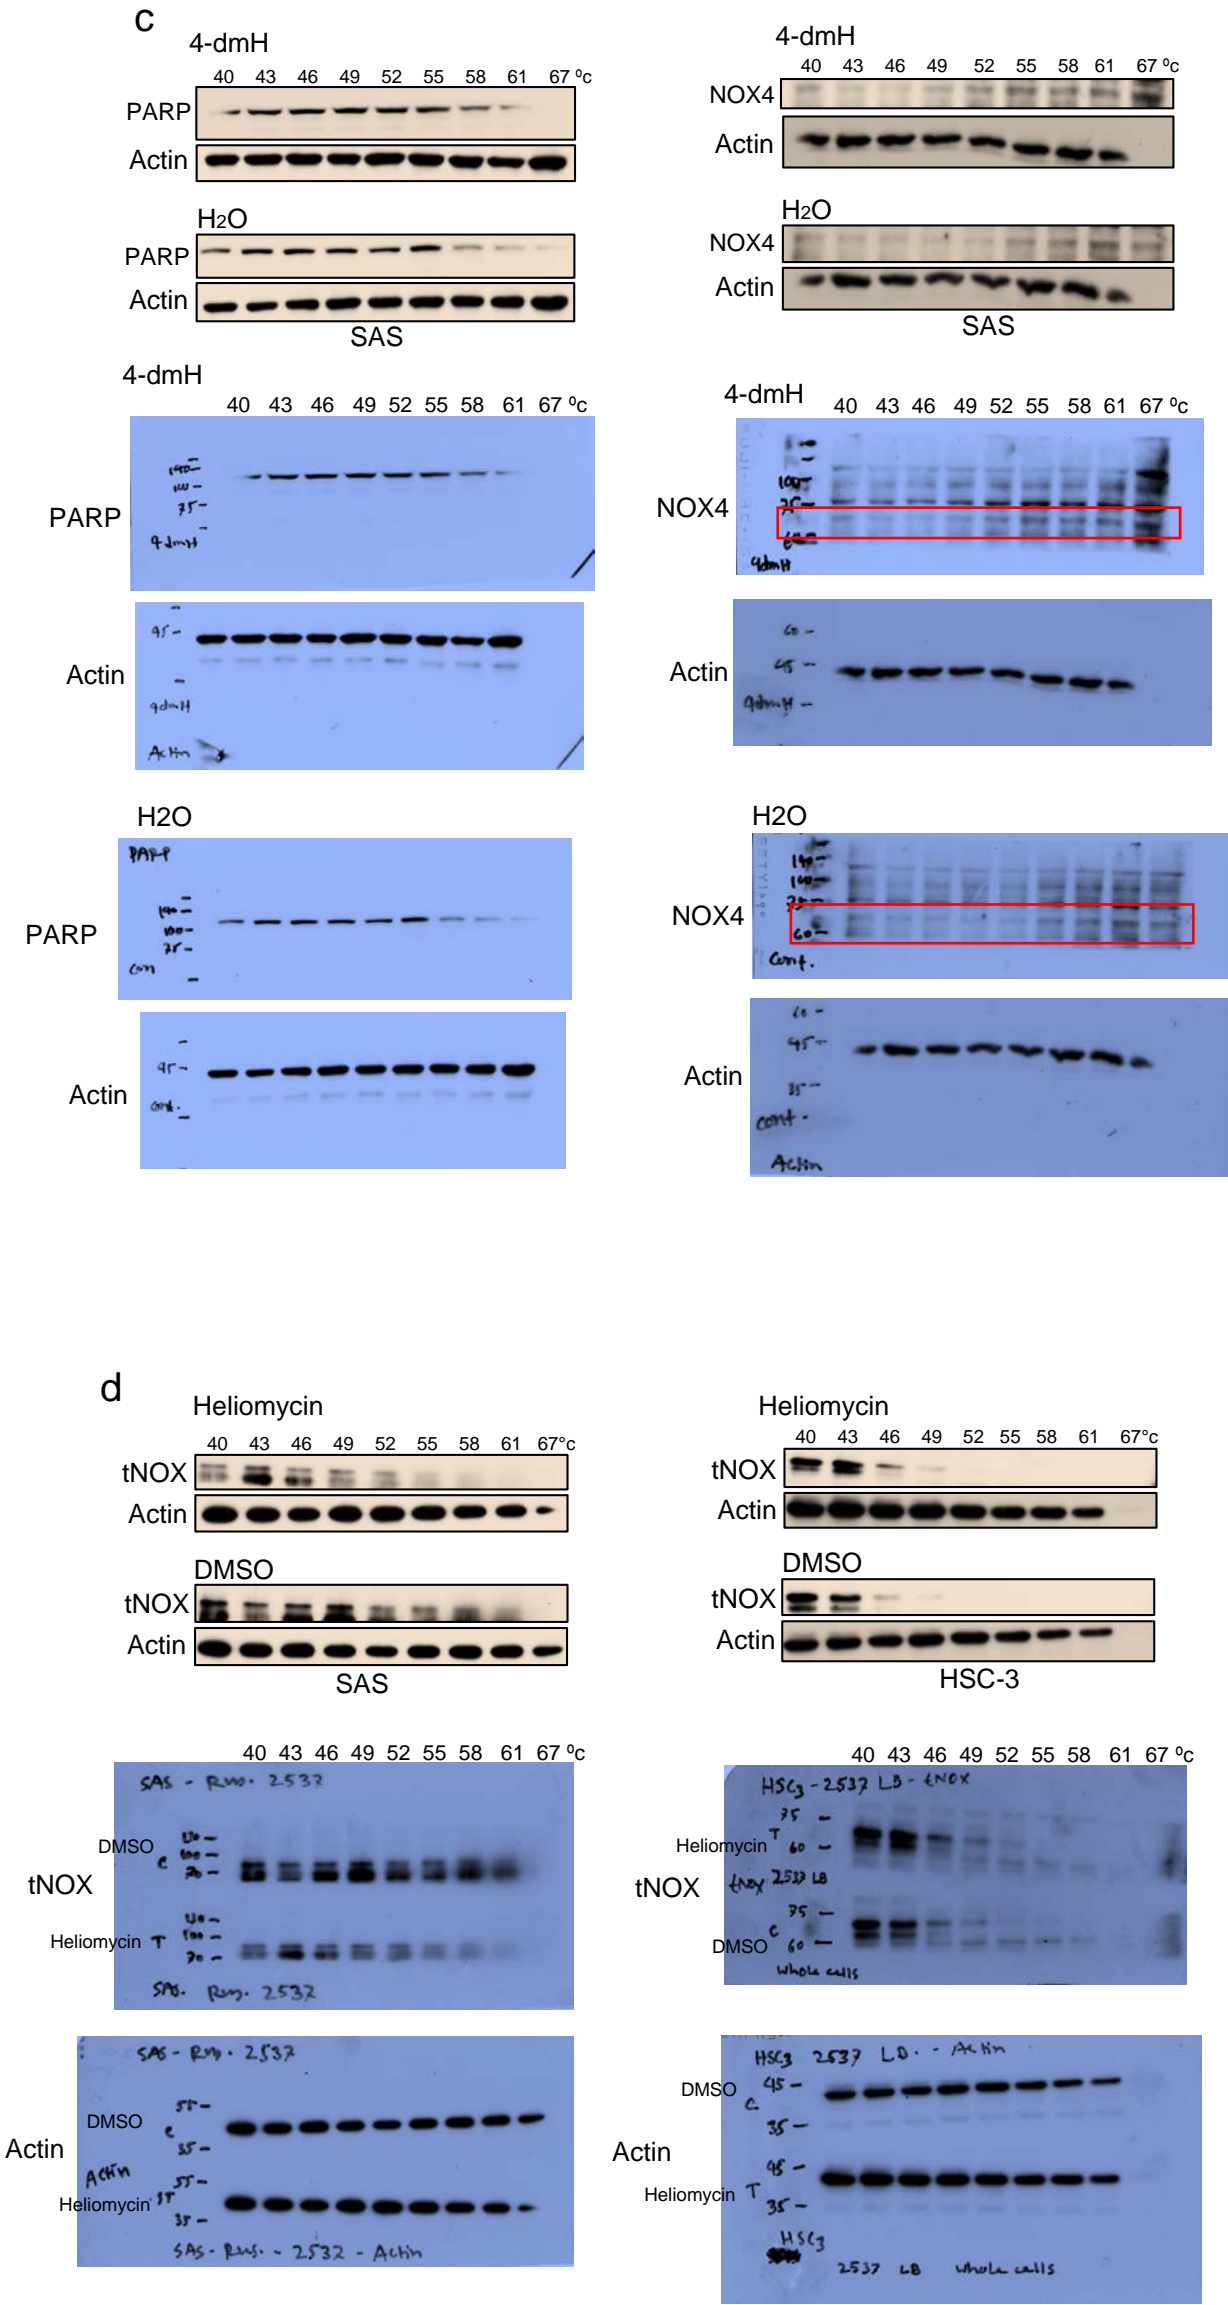

Supplement: fig8-data2 [file elife-87873-fig8-data2-v1.zip]
